# Supplementary material for: Health-related quality of life profiles in elderly people with age-related thoracic hyperkyphosis: a latent profile analysis
Source: Research Square preprint supplement (doi:10.21203/rs.3.rs-8623354/v1), 2026-02-11
Supplement: Supplementary file 1 [file 7e469316b8695eb64076cd12.xlsx]

## Sheet: 胸椎后凸
	Age	Gender(Male=1,Female=2)	Education(Elementary school and under=1,Middle school=2,High school and above=3)	Living Alone(Yes=1,No=2)	Occupation(Farmer=1,Worker=2,Retired Employee=3,Homemaker=4,Other=5)	SRS-22	SRS-22-Function	SRS-22-Pain	SRS-22-Self-image	SRS-22-Mental health	PASE	PASE leisure time	PASE household	PASE work-related activities	GDS-15	RESE	SSRS	SSRS subjective support	SSRS objective support	SSRS utilization of support	B-IPQ	B-IPQ cognitive illness representations	B-IPQ emotional representations	B-IPQ illness comprehensibility	Occiput-to-wall distance (OWD)	Latent profile analysis
NO.1	82	1	3	2	1	2.53	3	2.4	2.4	2.4	165.72	57.2	71.52	37	3	20	34	7	17	10	40	20	11	9	7.8	1
NO.2	79	1	2	2	1	2.53	3	2.4	2.6	2.2	194.45	68.21	95.34	30.9	4	18	35	10	18	7	39	19	15	5	7.2	1
NO.3	74	1	3	2	1	2.53	2.5	2.8	2.4	2.4	205.07	84.6	85.58	34.89	4	19	38	12	20	6	33	12	15	6	7.7	1
NO.4	72	1	2	2	1	2.74	3	2.8	2.4	2.8	211.9	98.3	74.8	38.8	2	22	40	12	21	7	32	14	8	10	7.1	1
NO.5	83	1	3	2	1	2.16	2	2.4	2	2.2	178.86	77.78	65.6	35.48	4	12	28	6	16	6	52	26	17	9	8	2
NO.6	72	1	3	2	5	2.79	3	2.8	2.6	2.8	220.67	84.78	96.5	39.39	1	24	34	10	16	8	39	18	14	7	7	1
NO.7	68	1	3	2	1	3.05	3.5	3.2	2.8	2.8	208.53	112.65	61.31	34.57	3	22	40	11	19	10	33	10	13	10	6.7	3
NO.8	72	2	3	2	1	2.74	2	3	2.6	3.2	213.15	99.8	113.35	0	2	22	36	10	17	9	39	17	14	8	7	1
NO.9	95	2	3	2	5	2.05	2	2	2.2	2	115.59	36.16	79.43	0	4	15	27	7	15	5	54	24	20	10	8.4	2
NO.10	73	2	3	1	1	2.47	3	2.4	2.4	2.2	179.73	64.33	115.4	0	4	20	27	10	11	6	38	22	11	5	7.4	1
NO.11	78	1	3	2	5	2.42	2	2	2.8	2.8	185.18	69.5	115.68	0	7	18	35	10	19	6	48	23	17	8	7.7	1
NO.12	85	1	3	2	1	2.21	2.5	2.4	2	2	127.79	48.99	46.2	32.6	4	14	30	10	12	8	45	20	17	8	8	2
NO.13	67	1	2	2	3	3.21	3.5	3.2	3	3.2	229.57	91.55	98.9	39.12	3	23	44	13	22	9	28	12	7	9	6.5	3
NO.14	70	2	3	2	1	2.63	3	2.4	2.4	2.8	217.52	98.65	118.87	0	2	20	40	12	20	8	38	19	9	10	7.5	1
NO.15	69	2	3	2	1	2.95	3	3	3	2.8	220.15	90.5	99.6	30.05	1	19	39	9	20	10	33	17	7	9	7	3
NO.16	87	1	3	1	1	2.21	2	2.4	2.2	2.2	154.2	68.64	85.56	0	5	14	34	11	18	5	49	23	17	9	8.1	2
NO.17	67	1	1	2	3	3.21	3.5	3	3	3.4	234.6	100.34	101.69	32.57	2	24	48	14	20	14	31	15	7	9	7	3
NO.18	74	1	2	2	1	2.68	3	2.6	2.4	2.8	216.75	80.43	100.56	35.76	3	16	37	10	18	9	40	20	12	8	7.5	1
NO.19	78	2	3	1	1	2.37	2.5	2.6	2.2	2.2	168.64	63.04	105.6	0	6	22	33	11	17	5	49	27	15	7	7.3	2
NO.20	75	1	3	2	1	2.53	3	2.4	2.4	2.4	209.37	94.63	82.74	32	5	21	36	10	20	6	45	22	15	8	8.1	1
NO.21	80	1	3	1	1	2.37	2.5	2.4	2.4	2.2	170.86	64.69	70.18	35.99	5	17	21	10	7	4	47	22	15	10	7.7	1
NO.22	76	1	2	2	1	2.63	2.5	2.6	2.6	2.8	207.45	70	102.85	34.6	3	18	38	8	23	7	37	17	10	10	7	1
NO.23	76	2	3	1	1	2.37	2.5	2.4	2.2	2.4	193.15	67.43	95.72	30	5	22	32	6	20	6	41	18	13	10	7.7	1
NO.24	88	2	3	2	1	2.05	2	2.2	2	2	121.6	41.65	79.95	0	5	17	36	10	21	5	50	26	17	7	8.1	2
NO.25	86	1	3	2	1	1.95	1.5	2	2	2.2	130.47	40.9	89.57	0	6	15	31	11	15	5	45	15	20	10	8.5	2
NO.26	88	2	3	1	1	2.05	2	2.2	2	2	121.85	45.31	76.54	0	7	13	34	12	16	6	56	30	17	9	8.2	2
NO.27	89	2	3	1	1	2.16	2	2.2	2.2	2.2	126.73	86.06	40.67	0	4	15	26	10	10	6	50	21	20	9	8.6	2
NO.28	92	1	3	2	1	2.21	2	2.4	2.2	2.2	122.57	33.88	88.69	0	4	16	36	13	17	6	51	27	17	7	8.7	2
NO.29	90	1	3	2	1	1.95	1.5	2	2	2.2	125.5	36.81	88.69	0	4	13	35	12	15	8	53	25	20	8	8.5	2
NO.30	76	1	3	2	1	2.42	2.5	2.4	2.4	2.6	198.77	71.03	96.77	30.97	2	21	37	10	18	9	39	20	10	9	7.5	1
NO.31	81	1	3	2	1	2.21	2.5	2.2	2.2	2	180.69	70.69	78.98	31.02	3	18	34	8	18	8	52	24	20	8	8	2
NO.32	86	1	3	2	3	2.26	2	2.4	2.2	2.4	166.79	48.37	118.42	0	4	19	40	12	20	8	45	20	17	8	7.8	2
NO.33	86	1	3	2	1	1.89	2	2.2	1.6	1.8	130.11	50.61	79.5	0	7	12	36	8	23	5	55	26	19	10	8	2
NO.34	90	2	3	1	1	1.84	1.5	2.2	1.8	1.8	120.54	33.91	86.63	0	7	10	19	8	7	4	60	33	19	8	8.4	2
NO.35	90	2	3	2	4	2.37	2.5	2.2	2.4	2.4	132.84	34.53	98.31	0	2	22	38	11	18	9	41	16	15	10	8	1
NO.36	67	2	3	2	1	3.21	3.5	3.2	3	3.2	233.77	94.6	102.51	36.66	3	20	35	14	13	8	35	13	13	9	7	3
NO.37	69	2	2	2	4	2.95	3	3	2.8	3	225.67	86.54	100.98	38.15	2	23	33	7	16	10	39	19	11	9	7.1	3
NO.38	76	2	3	2	4	2.63	3	2.8	2.4	2.6	199.55	70.32	89.67	39.56	2	20	38	10	19	9	35	13	13	9	6.6	1
NO.39	71	2	2	2	1	2.74	3	3	2.6	2.6	218.6	66.54	117.88	34.18	1	22	39	12	20	7	37	14	13	10	7.2	1
NO.40	63	2	3	2	1	3.21	3.5	3.2	3	3.2	215.89	61.25	115.6	39.04	1	22	35	10	16	9	20	7	6	7	6.5	3
NO.41	89	1	3	1	1	2.21	2.5	2.4	2	2	156.96	65.42	70.18	21.36	6	12	20	8	7	5	53	26	18	9	7.8	2
NO.42	70	1	2	1	1	2.58	2.5	2.6	2.6	2.6	201.65	57.6	107.9	36.15	4	20	30	10	8	12	43	19	16	8	7.4	1
NO.43	87	1	2	2	1	2.21	2	2	2.4	2.4	135.57	55.66	79.91	0	4	16	35	13	15	7	46	19	18	9	8	2
NO.44	69	2	3	1	2	2.79	3	3	2.6	2.6	219.44	75.59	113.31	30.54	3	22	35	12	18	5	39	15	15	9	6.9	1
NO.45	84	2	3	1	1	2.05	2.5	2.2	1.8	1.8	138.96	59.78	79.18	0	4	18	31	11	15	5	50	22	19	9	7.9	2
NO.46	65	1	3	2	5	3.26	3.5	3.2	3.4	3	182.93	76.13	78.4	28.4	2	25	48	14	22	12	25	10	10	5	6.7	3
NO.47	70	2	3	2	1	2.42	3	2.4	2	2.4	163.1	57.41	105.69	0	3	21	36	10	17	9	35	14	14	7	7.1	1
NO.48	67	2	2	2	4	3.11	3	3	3.2	3.2	218.37	73.66	109.01	35.7	1	23	39	15	16	8	32	16	10	6	6.5	3
NO.49	65	2	3	2	2	3	3.5	3	2.8	2.8	225.6	108.9	84.3	32.4	2	22	44	14	15	15	26	10	8	8	6.7	3
NO.50	78	2	3	2	1	2.21	2.5	2.6	2	1.8	175.69	61.89	113.8	0	7	17	31	15	10	6	47	20	21	6	7.4	2
NO.51	73	2	3	1	4	2.58	3	2.6	2.4	2.4	188.69	90.77	61.93	35.99	3	21	35	6	18	11	41	15	16	10	7.7	1
NO.52	79	1	2	2	1	2.58	3	2.6	2.4	2.4	190.9	109.92	43.44	37.54	3	16	34	12	15	7	37	19	11	7	7.7	1
NO.53	83	1	3	2	1	2.21	2.5	2	2.2	2.2	174.16	70.19	103.97	0	3	17	34	12	16	6	53	29	16	8	8.1	2
NO.54	79	1	3	2	1	2.63	3	2.8	2.4	2.6	235.33	112.57	90.19	32.57	2	21	42	12	20	10	31	14	10	7	7.5	1
NO.55	89	1	3	2	1	1.84	1.5	2.2	1.8	1.8	138.74	48.8	89.94	0	3	15	32	10	15	7	56	30	18	8	8.5	2
NO.56	73	2	3	2	1	2.58	3	2.6	2.4	2.4	212.5	74.5	103.6	34.4	3	21	33	6	20	7	44	16	18	10	7	1
NO.57	71	2	3	1	1	2.68	3	2.6	2.4	2.8	202.56	81.9	88.2	32.46	2	21	38	10	18	10	31	12	9	10	7	1
NO.58	64	2	3	2	1	3.11	3	3.2	3	3.2	240.3	108.32	96.4	35.58	2	24	38	13	16	9	21	11	4	6	6.7	3
NO.59	75	1	3	2	1	2.63	3	2.4	3	2.2	216.11	106.4	70.58	39.13	2	22	36	9	19	8	30	11	9	10	7.1	1
NO.60	65	1	3	2	4	3.05	3	3.2	3	3	212.72	108.32	73.6	30.8	4	23	46	12	22	12	30	9	11	10	7	3
NO.61	69	1	2	2	2	2.79	3	2.6	2.8	2.8	203.59	101.62	68.9	33.07	4	21	39	13	18	8	28	7	11	10	7.3	1
NO.62	77	1	2	2	4	2.47	3	2.6	2	2.4	186.17	73.94	112.23	0	4	19	38	10	22	6	39	16	13	10	7.6	1
NO.63	69	1	2	2	1	2.89	3	3	2.8	2.8	220.56	130.18	56.17	34.21	2	21	35	10	20	5	35	17	11	7	6.9	3
NO.64	90	1	3	2	3	1.95	2	2	1.8	2	228.88	106.28	91.3	31.3	3	18	45	13	26	6	53	23	20	10	8.5	2
NO.65	77	2	3	2	1	2.42	3	2.2	2.4	2.2	310.46	152.74	118.86	38.86	2	20	34	7	20	7	45	20	16	9	7.1	1
NO.66	87	2	3	2	1	1.95	1.5	2.4	1.8	2	166.8	56.56	80.12	30.12	3	14	38	12	15	11	46	22	16	8	7.9	2
NO.67	80	1	3	2	1	2.37	2.5	2.4	2.4	2.2	215.05	103.55	80.75	30.75	5	18	35	10	18	7	48	24	17	7	8	1
NO.68	73	2	3	2	1	2.37	2.5	2.2	2.4	2.6	288.26	152.34	102.96	32.96	3	18	44	15	20	9	40	17	15	8	7.2	1
NO.69	78	1	2	2	1	2.16	2	2.4	2	2.2	221.52	93.6	88.96	38.96	4	15	39	12	15	12	50	22	19	9	7.8	2
NO.70	87	2	3	2	1	1.89	1.5	2.2	2	1.8	177.19	85.79	55.7	35.7	4	12	38	10	20	8	48	21	20	7	9	2
NO.71	77	2	3	2	1	2.42	2.5	2.6	2.4	2.2	263.26	133.4	99.93	29.93	2	21	44	15	19	10	30	14	10	6	7.5	1
NO.72	67	2	2	2	1	3.21	3.5	2.8	3.2	3.4	177.92	86.6	60.66	30.66	2	23	40	13	14	13	30	17	5	8	7	3
NO.73	71	1	3	2	1	2.79	3	3	2.8	2.6	288.22	137.6	118.31	32.31	2	17	44	13	22	9	35	16	11	8	7.5	1
NO.74	85	1	3	2	1	2	1.5	2.6	1.8	2	125.1	74.3	50.8	0	5	11	35	12	12	11	52	23	20	9	8.8	2
NO.75	87	2	3	1	1	2.32	3	2.6	2	1.8	148.9	59.5	89.4	0	5	12	37	10	17	10	48	21	20	7	8	2
NO.76	75	1	3	2	1	2.58	3	2.4	2.6	2.6	195.9	87.8	81.8	26.3	1	20	45	16	20	9	33	14	10	9	7.6	1
NO.77	66	1	3	2	1	3.26	3.5	3.2	3	3.4	236.3	113.4	87.5	35.4	2	24	43	12	17	14	24	10	7	7	6.8	3
NO.78	75	1	3	1	1	2.37	2.5	2.6	2.4	2	265.7	133.34	101.18	31.18	3	16	37	11	16	10	37	14	15	8	7.3	1
NO.79	83	1	3	2	1	1.84	1.5	2	2	1.8	191.2	105.6	57.8	27.8	6	12	34	12	13	9	54	26	19	9	8.2	2
NO.80	76	1	3	1	1	2.42	2.5	2.4	2.4	2.4	249.24	124.3	92.47	32.47	3	17	34	13	11	10	44	23	14	7	7.5	1
NO.81	76	2	3	2	1	2.05	1.5	2.4	2.2	2	253.9	112.9	110.5	30.5	6	14	30	9	10	11	45	18	17	10	7.6	2
NO.82	76	2	3	2	1	2.74	3	2.8	2.6	2.6	307.5	164.3	111.6	31.6	1	18	40	11	20	9	29	13	10	6	7.4	1
NO.83	77	1	3	1	1	2.37	2.5	2.4	2.4	2.2	252.85	124.35	99.25	29.25	4	18	36	15	11	10	47	20	18	9	7.7	1
NO.84	75	1	3	2	1	2.42	2.5	2.6	2.2	2.4	282.9	138.3	107.3	37.3	2	17	31	10	10	11	40	15	15	10	7.6	1
NO.85	62	1	3	2	1	3.47	3.5	3.8	3.2	3.4	249.68	120.64	95.57	33.47	1	24	42	15	17	10	17	6	5	6	6.5	3
NO.86	66	2	3	1	4	2.95	3.5	3.2	2.8	2.6	232.73	90.4	112.33	30	3	21	37	10	17	10	30	9	15	6	6.7	3
NO.87	68	2	3	2	1	3.11	3	3.2	3.2	3	222.7	99.5	102.7	20.5	2	24	36	14	15	7	31	15	8	8	7	3
NO.88	70	2	3	2	1	3.16	3.5	3.2	3	3	141.6	44.5	76.8	20.3	3	19	36	13	16	7	34	16	10	8	7.6	3
NO.89	73	2	3	2	4	2.53	2.5	2.6	2.6	2.6	195.4	80.68	114.72	0	4	22	42	10	20	12	42	23	14	5	7.5	1
NO.90	87	1	3	2	1	2.11	2	2.4	2	2	208.37	101.77	83.3	23.3	3	15	38	10	19	9	45	21	17	7	8.2	2
NO.91	67	1	3	2	1	3.05	3	2.8	3.2	3.2	216.4	122.11	66.3	27.99	2	22	39	14	15	10	29	17	5	7	7.1	3
NO.92	63	2	3	2	1	3.26	3.5	3.4	3.2	3	216.6	96.4	100.68	19.52	1	22	44	15	18	11	18	5	5	8	6.5	3
NO.93	61	2	3	2	4	3.42	3.5	3.4	3.4	3.4	283.95	130.6	116.67	36.68	1	24	41	14	16	11	12	6	3	3	6.6	3
NO.94	76	2	2	2	1	2.84	3	2.8	2.6	3	206.4	60.14	116.26	30	1	20	41	13	19	9	31	14	11	6	7.2	1
NO.95	70	1	1	2	3	3.42	3.5	3.2	3.4	3.6	197.28	114.51	60.4	22.37	0	25	42	14	20	8	22	10	5	7	6.8	3
NO.96	73	1	2	2	1	2.58	2.5	2.8	2.6	2.6	220.03	103.2	82.51	34.32	2	22	36	12	17	7	41	26	10	5	7.5	1
NO.97	69	1	2	2	1	3.05	3.5	3	3	2.8	225.6	116.6	81.2	27.8	2	19	42	9	19	14	31	10	12	9	7.3	3
NO.98	76	1	3	2	1	2.63	2.5	3	2.6	2.6	188.55	87.81	70.74	30	2	17	36	10	16	10	40	18	13	9	7.7	1
NO.99	74	1	1	2	3	2.68	3	2.4	2.6	2.8	205.3	100.3	79	26	2	19	46	15	20	11	33	17	10	6	7	1
NO.100	66	1	1	2	5	3.32	3.5	3.2	3.2	3.4	218.6	106.5	78.7	33.4	1	23	44	14	20	10	23	13	4	6	6.7	3
NO.101	82	1	3	2	4	2.21	2.5	2	2	2.4	132.82	66.41	66.41	0	3	18	41	10	20	11	47	24	16	7	9	2
NO.102	76	2	2	2	1	2.74	3	2.8	2.6	2.6	202.82	69.5	103.32	30	1	25	43	9	22	12	23	11	7	5	6.7	1
NO.103	89	1	3	2	1	2.26	2	2.4	2	2.6	139.51	43.21	96.3	0	2	17	41	10	17	14	51	25	19	7	9.2	2
NO.104	77	1	3	2	1	2.16	2	2.4	2	2.2	149.89	49.34	100.55	0	5	20	34	7	13	14	52	26	19	7	7.5	2
NO.105	81	2	3	2	1	1.89	2	2	2	1.6	129.23	73.34	55.89	0	7	15	43	7	26	10	43	18	20	5	8.7	2
NO.106	76	2	3	1	1	2.26	2	2.6	2.4	2	192	80.5	77.5	34	4	19	35	10	15	10	58	33	19	6	7.6	2
NO.107	65	2	3	2	4	2.84	3	2.8	2.8	2.8	207.72	69.3	108.42	30	3	22	47	15	20	12	36	18	10	8	7	1
NO.108	87	2	3	2	4	1.95	2	2	1.8	2	125.6	46.7	78.9	0	5	16	38	10	17	11	52	22	20	10	8.8	2
NO.109	86	1	3	2	1	1.95	1.5	2	1.8	2.4	146.5	67.2	79.3	0	3	15	44	11	20	13	48	28	10	10	9.7	2
NO.110	82	2	3	2	1	1.89	1.5	2	1.8	2.2	164.1	98.2	65.9	0	5	13	31	11	10	10	56	28	18	10	9.2	2
NO.111	87	1	3	2	1	2.42	2.5	2.4	2	2.8	139.5	52.6	86.9	0	2	19	45	15	20	10	40	25	10	5	8.3	1
NO.112	70	1	2	2	1	2.84	3.5	2.8	2.6	2.6	223.58	124.8	67.23	31.55	1	22	40	9	19	12	31	14	10	7	7.1	1
NO.113	66	2	3	2	4	3.11	3.5	3	3	3	214.5	76.3	102.6	35.6	2	21	38	7	15	16	36	18	10	8	6.6	3
NO.114	72	1	3	2	1	2.63	3.5	2.4	2.2	2.6	226.84	125.4	67.89	33.55	2	21	41	11	17	13	40	16	14	10	7.7	1
NO.115	73	1	3	2	1	2.53	2.5	2.6	2.6	2.4	205.9	105.6	79.5	20.8	4	20	37	7	17	13	42	14	18	10	7.6	1
NO.116	81	1	3	2	1	2.11	2	2.6	2	1.8	134.8	58.5	76.3	0	5	16	40	10	18	12	45	19	18	8	8.4	2
NO.117	75	2	3	1	1	2.68	3.5	2.6	2.6	2.2	202.57	98.7	103.87	0	2	21	37	9	16	12	39	21	10	8	7.3	1
NO.118	72	2	3	2	1	2.32	2.5	2.2	2.6	2.2	185.7	67.8	117.9	0	5	18	36	5	17	14	46	18	19	9	7.2	1
NO.119	77	1	3	2	1	2.26	2.5	2.2	2.2	2.4	159.96	65.3	94.66	0	3	15	36	10	16	10	44	17	18	9	7.9	2
NO.120	74	1	2	2	1	2.53	3	2.2	2.6	2.6	204.14	112.7	52.89	38.55	3	18	39	11	15	13	37	17	10	10	7.5	1
NO.121	72	1	2	2	1	2.47	2.5	2.4	2.6	2.4	218.52	112.69	74.55	31.28	3	17	39	11	18	10	42	18	15	9	7.4	1
NO.122	61	1	1	2	2	3.32	3.5	3.4	3.2	3.2	264.51	133.5	95.32	35.69	0	25	48	12	23	13	20	10	2	8	6.5	3
NO.123	68	2	2	2	1	2.63	3	2.6	2.4	2.6	219.69	106.39	92.5	20.8	1	21	39	8	19	12	32	15	10	7	7	1
NO.124	79	2	2	2	1	2.11	2	2.2	2.2	2	167.78	63.28	104.5	0	4	15	37	10	19	8	43	21	16	6	8.1	2
NO.125	70	1	3	2	1	2.68	3	2.6	2.6	2.6	211.63	86.4	93.9	31.33	2	21	36	9	17	10	33	15	10	8	6.8	1
NO.126	73	1	3	1	1	2.63	3	2.6	2.6	2.4	239.4	122.1	85.7	31.6	3	22	35	9	16	10	37	16	12	9	7.2	1
NO.127	65	1	3	2	1	2.89	3	3	2.6	3	223.21	114.41	75.3	33.5	1	20	39	10	17	12	28	13	5	10	6.8	3
NO.128	61	2	2	2	1	3.26	3.5	3.4	3.2	3	271.44	118.5	114.5	38.44	0	22	40	13	17	10	21	10	5	6	6.7	3
NO.129	80	2	3	2	1	2.11	2	2	2	2.4	140.1	48.9	91.2	0	4	15	34	12	12	10	51	22	19	10	8.3	2
NO.130	78	1	3	2	3	2.26	2.5	2.6	2	2	141.1	57.9	83.2	0	4	18	36	12	15	9	47	20	18	9	7.9	2
NO.131	72	1	3	2	5	2.63	3	2.6	2.4	2.6	214.91	122.2	56.31	36.4	2	18	38	11	16	11	37	19	9	9	7.5	1
NO.132	67	1	3	2	1	3.05	3.5	3	2.8	3	227.72	128.5	64.3	34.92	2	20	37	10	15	12	32	17	10	5	7	3
NO.133	69	1	1	2	1	2.89	3	2.8	2.8	3	233.08	104.3	96.45	32.33	1	18	40	10	17	13	42	16	16	10	7.1	3
NO.134	73	1	3	2	1	2.58	3	2.4	2.6	2.4	220.52	100.7	82.5	37.32	2	21	39	10	19	10	41	21	12	8	7.3	1
NO.135	79	1	3	2	1	2.11	2	2	2.2	2.2	289.58	140.78	109.4	39.4	3	16	38	9	17	12	44	19	16	9	8.1	2
NO.136	79	1	3	2	5	2.21	2.5	2	2.2	2.2	273.87	143.65	100.11	30.11	3	16	38	11	17	10	44	18	16	10	8.2	2
NO.137	91	2	3	2	1	1.89	1.5	2	1.8	2.2	104.74	38.8	65.94	0	5	14	30	10	10	10	55	28	20	7	9.1	2
NO.138	62	2	3	2	1	3.21	3.5	3.4	3	3	276.7	137.6	105.3	33.8	2	21	39	11	15	13	18	6	4	8	6.7	3
NO.139	77	1	3	2	1	2.37	2.5	2.4	2.2	2.4	182.45	74.9	107.55	0	4	15	38	9	14	15	46	26	15	5	7.8	1
NO.140	75	2	3	2	1	2.68	3	2.8	2.4	2.6	192.11	86.71	105.4	0	3	22	35	15	14	6	41	19	13	9	7.4	1
NO.141	81	2	3	1	1	2.21	2	2.2	2.2	2.4	181.9	78.5	103.4	0	4	17	29	8	11	10	50	27	17	6	8.4	2
NO.142	70	1	1	2	1	3	3	3	3	3	229.83	114.33	101.2	14.3	2	23	43	9	17	17	30	15	7	8	7.1	3
NO.143	73	2	3	2	1	2.53	2.5	2.6	2.6	2.4	243.4	103.3	119.3	20.8	6	20	30	7	11	12	45	17	20	8	7.7	1
NO.144	75	2	3	2	1	2.74	3	2.6	2.6	2.8	219.5	79.4	112.6	27.5	2	20	43	16	14	13	39	22	11	6	7.5	1
NO.145	70	1	2	2	1	3.21	3.5	3.2	3	3.2	194.48	80.7	82.88	30.9	1	25	45	12	20	13	22	11	4	7	6.8	3
NO.146	75	2	2	2	1	2.42	2.5	2.4	2.4	2.4	292.6	145.4	108.6	38.6	4	16	43	11	19	13	47	19	18	10	7.8	1
NO.147	68	2	3	2	1	2.95	3.5	3	2.8	2.6	212.95	91.22	91.34	30.39	3	23	46	14	20	12	32	13	10	9	6.7	3
NO.148	74	2	3	2	1	2.68	2.5	2.8	2.8	2.6	214.45	96.55	91.4	26.5	3	20	43	13	20	10	34	16	9	9	7.6	1
NO.149	83	2	3	1	1	2.05	2	2.2	2	2	126.81	40.41	86.4	0	5	16	40	10	20	10	50	22	19	9	8.3	2
NO.150	85	2	3	2	1	2.11	2	2	2	2.4	125.1	36.7	88.4	0	3	15	42	12	20	10	50	25	17	8	8.6	2
NO.151	79	2	3	2	1	2.16	2	2.2	2.4	2	130.52	43.22	87.3	0	5	15	40	11	20	9	48	21	17	10	8.4	2
NO.152	77	2	3	2	1	2.37	2.5	2.4	2.4	2.2	179.2	67.8	111.4	0	6	14	37	13	15	9	48	24	17	7	7.8	1
NO.153	67	1	1	2	5	3.21	3.5	3.4	3	3	239.1	105.4	95.4	38.3	0	25	46	9	21	16	22	10	4	8	6.5	3
NO.154	69	2	2	2	1	2.95	3.5	2.6	3	2.8	208.49	113.2	55.8	39.49	2	17	43	10	22	11	28	11	10	7	7.5	3
NO.155	69	1	2	2	1	2.95	3	2.8	3	3	212.1	117.3	65.14	29.66	3	18	33	10	13	10	31	14	8	9	7.4	3
NO.156	73	1	3	2	1	2.58	2.5	2.6	2.6	2.6	193.57	100.67	72.4	20.5	4	21	37	9	14	14	43	21	15	7	7.6	1
NO.157	62	1	1	2	5	3.26	3.5	3.2	3.2	3.2	239.2	124.5	91.3	23.4	2	23	40	10	18	12	35	17	10	8	6.6	3
NO.158	62	2	1	2	1	3.21	3.5	3	3.2	3.2	134.87	10.4	103.7	20.77	2	24	44	10	20	14	17	5	5	7	6.7	3
NO.159	77	2	3	2	1	2.16	2	2	2.2	2.4	171.83	54.33	117.5	0	3	13	34	9	15	10	50	29	15	6	8.1	2
NO.160	86	1	3	2	1	2.05	2	2.4	1.8	2	144.34	56.78	87.56	0	2	15	37	9	19	9	46	20	20	6	8.1	2
NO.161	72	1	2	2	1	2.58	3	2.4	2.4	2.6	196.2	94.3	63.6	38.3	3	15	39	10	19	10	38	14	15	9	7.4	1
NO.162	80	1	3	2	3	2.42	2	2.4	2.4	2.8	181.5	74.3	107.2	0	2	20	38	7	18	13	38	16	14	8	7.8	1
NO.163	86	1	3	2	1	2.05	2	2	2	2.2	134.1	54.3	79.8	0	4	16	41	8	19	14	48	23	16	9	8.4	2
NO.164	89	2	3	2	1	1.89	1.5	2	2	2	123.01	38.11	84.9	0	5	16	36	10	16	10	50	29	15	6	9	2
NO.165	71	1	3	2	1	2.58	3	2.6	2.4	2.6	229.9	102.5	93.7	33.7	3	17	38	9	19	10	36	17	11	8	7.2	1
NO.166	79	1	3	2	1	2.26	2	2.4	2.4	2.2	140.84	65.4	75.44	0	3	16	40	10	19	11	50	26	17	7	7.8	2
NO.167	77	2	3	1	4	2.42	2.5	2.4	2.4	2.4	187.31	78.11	109.2	0	4	19	42	9	18	15	44	17	17	10	7.6	1
NO.168	63	1	1	2	1	3.05	3	3.2	3	3	231.83	115.33	85.4	31.1	1	21	39	9	20	10	19	8	4	7	6.7	3
NO.169	72	1	3	2	1	2.58	3	2.4	2.4	2.6	201.25	126.3	41.51	33.44	2	16	39	10	19	10	34	13	11	10	7.3	1
NO.170	80	2	3	2	1	2.11	2	2	2.2	2.2	161.78	63.28	98.5	0	4	16	39	12	16	11	52	27	18	7	8.1	2
NO.171	70	2	3	1	1	2.89	3	3	2.8	2.8	222.98	94.38	99.4	29.2	2	23	36	10	14	12	33	14	10	9	7.1	3
NO.172	87	2	3	2	5	2.16	2	2	2.2	2.4	130.86	41.2	89.66	0	4	18	38	10	15	13	46	27	11	8	8	2
NO.173	68	1	2	2	1	3.05	3.5	3	3	2.8	209.18	78.29	106.3	24.59	2	24	41	11	16	14	29	13	10	6	6.9	3
NO.174	90	2	3	2	5	1.95	2	2	1.8	2	120.6	41.2	79.4	0	4	16	34	7	15	12	48	22	17	9	8.8	2
NO.175	67	1	2	2	2	3.05	3.5	2.8	3	3	222.98	107.88	81.5	33.6	2	22	35	8	17	10	30	15	7	8	7	3
NO.176	76	2	3	2	1	2.53	2.5	2.4	2.4	2.8	181.63	76.3	105.33	0	2	21	38	9	18	11	40	24	10	6	7.5	1
NO.177	71	1	3	2	5	2.68	3	2.6	2.6	2.6	209.2	112.59	69.2	27.41	2	18	41	10	16	15	38	15	15	8	7.3	1
NO.178	78	2	3	1	1	2.47	2.5	2.4	2.4	2.6	179.83	72.12	107.71	0	3	20	36	8	18	10	42	19	13	10	7.7	1
NO.179	77	2	3	2	1	2.47	2.5	2.4	2.4	2.6	176.2	63.9	112.3	0	3	18	40	10	16	14	46	23	17	6	7.7	1
NO.180	88	2	3	2	1	2.16	2	2.2	2.2	2.2	125.85	42.65	83.2	0	5	14	39	10	16	13	52	27	18	7	8.6	2
NO.181	83	1	3	2	1	2.16	2	2.2	2.2	2.2	140.59	56.38	84.21	0	4	17	36	8	18	10	51	22	19	10	8.4	2
NO.182	78	1	3	2	1	2.37	2	2.4	2.4	2.6	163.51	60.91	102.6	0	3	19	34	10	13	11	44	26	13	5	7.8	1
NO.183	79	2	3	2	1	2.32	2	2.6	2.4	2.2	145.4	63.26	82.14	0	5	16	33	10	13	10	49	27	15	7	8.1	2
NO.184	62	1	1	2	5	3.21	3.5	3	3.2	3.2	244.7	134.2	79.3	31.2	1	25	41	10	17	14	20	10	3	7	6.8	3
NO.185	74	1	2	2	1	2.89	3.5	2.6	3	2.6	204.92	90.12	94.3	20.5	3	22	34	10	14	10	34	11	13	10	7.3	1
NO.186	76	1	3	2	1	2.74	3	2.6	2.8	2.6	203.4	83.2	109.4	10.8	4	22	31	8	13	10	37	17	14	6	7.5	1
NO.187	69	2	3	2	1	3	3	3	2.8	3.2	222.03	85.13	116.4	20.5	2	21	34	11	12	11	32	12	10	10	7.2	3
NO.188	85	2	1	2	1	2.05	2	2	2	2.2	103.9	31.8	72.1	0	5	13	35	9	15	11	53	26	18	9	8.9	2
NO.189	65	1	1	2	2	3.32	3.5	3.4	3	3.4	229	120.1	72.5	36.4	0	25	39	13	15	11	20	7	4	9	6.7	3
NO.190	62	1	3	2	1	3.21	3.5	3.4	3	3	244.14	134.3	79.4	30.44	2	24	42	13	18	11	18	9	5	4	6.7	3
NO.191	61	2	2	2	1	3.26	3.5	3.2	3.2	3.2	246.58	120.18	102.1	24.3	1	23	37	12	14	11	19	10	3	6	6.5	3
NO.192	70	2	2	2	1	2.74	3	2.8	2.6	2.8	228.16	113.2	85.66	29.3	3	21	35	11	13	11	34	13	15	6	7.3	1
NO.193	93	1	2	2	3	2.16	2.5	2	2	2.2	132.1	53.9	78.2	0	3	17	42	11	18	13	48	24	14	10	8.1	2
NO.194	67	2	3	2	1	3.21	3.5	3.2	3.2	3	221.94	101.24	108.4	12.3	2	23	37	11	13	13	24	16	4	4	6.8	3
NO.195	70	2	3	2	1	2.84	3	2.8	2.8	2.8	220.5	94.3	95.8	30.4	2	24	38	10	17	11	36	14	13	9	7.1	1
NO.196	74	1	3	2	1	2.53	2.5	2.6	2.6	2.6	207.37	96.77	89.4	21.2	4	21	35	9	15	11	39	14	15	10	7.8	1
NO.197	80	1	2	2	1	2.21	2.5	2	2.2	2.2	156	56.8	99.2	0	4	16	35	10	14	11	49	24	17	8	8.2	2
NO.198	76	2	3	2	1	2.63	3	2.6	2.6	2.6	208.4	89.4	98.5	20.5	3	23	34	9	14	11	39	17	15	7	7.7	1
NO.199	86	1	1	2	3	2.37	2.5	2.4	2.2	2.4	143.53	64.33	79.2	0	3	17	38	13	15	10	47	22	17	8	8	1
NO.200	66	1	3	2	1	3.21	3.5	3	3.2	3.2	210.5	96.7	80.2	33.6	1	23	36	9	15	12	23	14	4	5	6.8	3
NO.201	67	1	3	2	1	3.26	3.5	3.2	3.2	3.2	223.77	125.3	62.1	36.37	0	24	42	12	16	14	23	10	6	7	6.7	3
NO.202	68	2	2	2	1	3.11	3	3.2	3.2	3	237.01	100.3	116.4	20.31	1	23	36	10	14	12	26	11	7	8	6.8	3
NO.203	64	2	3	2	1	3.32	3.5	3.4	3.2	3.2	254.3	125.6	92.3	36.4	0	25	38	11	14	13	20	10	5	5	6.5	3
NO.204	63	2	3	2	1	3.26	3.5	3.2	3.2	3.2	239.35	111.3	90.24	37.81	0	25	35	9	15	11	21	11	4	6	6.6	3
NO.205	72	1	1	2	1	2.63	3	2.6	2.4	2.6	206.94	110.3	66.2	30.44	1	23	26	7	10	9	31	15	10	6	7.3	1
NO.206	77	2	3	1	1	2.47	2.5	2.2	2.6	2.6	176.17	66.77	109.4	0	3	19	31	7	14	10	42	21	15	6	7.9	1
NO.207	73	2	3	2	1	2.68	2.5	2.8	2.6	2.8	185.51	60.4	99.81	25.3	2	23	36	11	14	11	37	19	11	7	7.5	1
NO.208	87	1	3	2	5	2.37	2	2.4	2.4	2.6	129.74	50.3	79.44	0	3	17	39	9	15	15	49	23	17	9	8.7	1
NO.209	66	1	3	1	1	3.37	3.5	3.2	3.4	3.4	225.96	137.3	50.78	37.88	0	25	38	12	13	13	21	7	4	10	6.7	3
NO.210	74	1	3	2	1	2.47	2.5	2.4	2.6	2.4	194.03	100.4	64.33	29.3	3	20	36	10	14	12	41	19	15	7	7.9	1
NO.211	71	1	3	2	1	2.89	3	2.8	2.8	3	216.26	109.3	76.41	30.55	1	20	36	9	16	11	32	15	7	10	7.3	3
NO.212	62	2	3	2	1	3.26	3.5	3.2	3.2	3.2	252.56	130.6	89.3	32.66	0	25	40	13	16	11	16	5	4	7	6.6	3
NO.213	86	1	3	2	1	2.42	2.5	2.4	2.4	2.4	245.9	126.3	89.8	29.8	2	19	36	10	16	10	46	24	15	7	8.3	1
NO.214	79	1	3	2	1	2.47	2.5	2.6	2.4	2.4	144.3	53.55	90.75	0	3	15	48	12	23	13	50	25	17	8	8	1
NO.215	88	1	3	2	1	2.42	2.5	2.4	2	2.8	113.8	56.9	56.9	0	3	16	40	10	18	12	46	26	15	5	8.3	1
NO.216	77	1	3	2	1	2.47	2.5	2.4	2.4	2.6	189.48	99.3	78.88	11.3	4	20	45	13	22	10	46	20	18	8	8	1
NO.217	80	1	3	2	1	2.32	2.5	2.6	2.2	2	199	68.9	96.2	33.9	5	17	42	8	24	10	51	27	20	4	7.9	2
NO.218	68	2	3	2	1	3	3	3	3	3	218.14	98.4	90.3	29.44	2	24	46	10	24	12	27	10	7	10	6.7	3
NO.219	73	2	3	2	1	2.79	3	2.6	2.8	2.8	216.43	79.6	106.5	30.33	3	23	45	11	23	11	38	22	11	5	7.5	1
NO.220	75	2	3	1	1	2.53	3	2.2	2.6	2.6	186.17	66.77	119.4	0	3	19	46	13	23	10	43	24	15	4	7.5	1
NO.221	68	2	3	2	1	3	3	2.8	3	3.2	219.1	103.3	80.4	35.4	0	25	45	8	24	13	31	18	8	5	6.9	3
NO.222	80	2	3	2	1	2.21	2.5	2.2	2.2	2	180.69	110.69	48.98	21.02	4	18	47	13	23	11	54	27	20	7	8	2
NO.223	68	1	2	2	1	2.95	3	3	3	2.8	212.15	117.5	64.6	30.05	1	22	42	10	20	12	32	14	9	9	7	3
NO.224	67	1	2	2	1	3.16	3.5	3.2	3	3	221.94	91.24	98.4	32.3	1	23	44	11	20	13	25	10	10	5	6.9	3
NO.225	70	2	2	2	1	2.95	3	3	2.8	3	213.58	94.8	87.23	31.55	2	25	42	11	20	11	34	13	15	6	7.1	3
NO.226	61	1	1	2	1	3.26	3.5	3.2	3.2	3.2	243.48	117.08	92.1	34.3	0	25	37	10	17	10	21	8	4	9	6.5	3
NO.227	88	2	3	2	1	2.26	2	2.4	2.4	2.2	122.7	43.4	79.3	0	5	19	39	10	18	11	52	23	19	10	8.6	2
NO.228	69	2	3	2	1	2.68	3	2.6	2.8	2.6	234.96	99.8	114.66	20.5	4	21	41	11	19	11	35	20	7	8	7	1
NO.229	76	1	3	2	1	2.63	3	2.6	2.6	2.6	207.5	89.4	87.5	30.6	3	22	38	9	19	10	37	16	14	7	7.6	1
NO.230	79	1	2	2	3	2.63	3	2.6	2.6	2.6	222.1	99.4	97.5	25.2	3	22	38	9	18	11	36	16	13	7	7.8	1
NO.231	71	1	3	2	1	2.79	3	2.6	2.8	2.8	218.15	109.3	75.3	33.55	1	24	42	11	20	11	32	13	10	9	7.2	1
NO.232	78	1	3	2	1	2.42	2.5	2.4	2.4	2.6	183.27	76.25	79.22	27.8	2	21	40	10	20	10	35	13	12	10	7.9	1
NO.233	66	2	3	2	5	3.21	3.5	3.2	3.2	3	222.38	83.1	99.4	39.88	1	21	45	11	23	11	22	14	4	4	6.7	3
NO.234	63	2	1	2	1	3.26	3.5	3.2	3.2	3.2	230.02	96.3	94.22	39.5	1	24	40	10	19	11	22	10	6	6	6.5	3
NO.235	64	2	3	2	1	3.21	3.5	3.2	3.2	3	226.84	109.3	83.44	34.1	1	23	39	10	19	10	22	11	4	7	6.7	3
NO.236	72	1	2	2	1	2.58	3	2.4	2.6	2.4	209.74	97.44	79.1	33.2	1	23	38	8	20	10	37	14	15	8	7.4	1
NO.237	78	2	3	2	4	2.47	2.5	2.6	2.4	2.4	205.43	60.44	114.33	30.66	3	21	39	10	18	11	43	17	16	10	7.4	1
NO.238	74	1	3	1	1	2.53	2.5	2.6	2.6	2.4	226.25	109.4	96.55	20.3	3	21	37	11	15	11	41	19	14	8	7.7	1
NO.239	83	2	3	1	1	2.16	2	2.2	2.2	2.2	160.8	45.7	82.1	33	4	16	37	10	16	11	55	29	20	6	8.3	2
NO.240	87	1	3	2	1	2.32	2.5	2.4	2.2	2.2	131.1	50.6	80.5	0	3	18	38	10	17	11	50	29	15	6	8.2	2
NO.241	77	1	3	2	1	2.47	2.5	2.4	2.4	2.6	209.9	63.9	112.3	33.7	3	18	36	10	15	11	45	22	17	6	7.7	1
NO.242	75	1	3	2	1	2.63	3	2.4	2.6	2.6	189.6	77.8	111.8	0	3	22	39	7	20	12	44	16	18	10	7.5	1
NO.243	76	1	3	2	1	2.53	2.5	2.4	2.4	2.8	276.96	136.3	105.33	35.33	3	20	34	8	15	11	44	16	18	10	7.9	1
NO.244	68	1	3	2	1	3.05	3.5	3	2.8	3	238.55	125.6	79.4	33.55	0	24	37	9	16	12	29	13	8	8	7	3
NO.245	72	2	3	2	1	2.58	3	2.4	2.6	2.4	184.3	69.8	114.5	0	3	22	35	8	13	14	42	18	17	7	7.4	1
NO.246	71	2	3	1	1	2.68	3	2.6	2.6	2.6	209.2	102.59	79.2	27.41	2	22	37	11	15	11	40	18	13	9	7.1	1
NO.247	83	1	3	2	1	2.05	2	2.2	2	2	136.81	50.41	86.4	0	4	15	41	13	17	11	56	32	18	6	8.5	2
NO.248	76	2	3	2	1	2.58	3	2.4	2.6	2.6	192.6	104.5	67.5	20.6	2	22	33	6	14	13	40	16	14	10	7.7	1
NO.249	64	2	2	2	1	3.26	3.5	3.2	3	3.4	240.95	95.45	119.7	25.8	0	24	42	12	19	11	24	10	5	9	6.6	3
NO.250	69	2	3	2	4	2.79	3	2.6	2.8	2.8	179.1	65.9	113.2	0	2	22	40	12	18	10	34	18	10	6	7	1
NO.251	67	1	3	2	1	3.05	3.5	3.2	2.8	2.8	221.23	107.4	89.33	24.5	1	23	43	11	20	12	26	9	9	8	6.8	3
NO.252	67	2	3	2	1	3.11	3	3.2	3.2	3	218.64	89.9	105.44	23.3	0	24	40	9	20	11	35	17	9	9	6.8	3
NO.253	72	2	3	2	5	2.63	3	2.6	2.6	2.4	190.25	89.4	80.55	20.3	3	23	34	5	19	10	43	23	15	5	7.3	1
NO.254	91	2	3	2	4	2	2	2	1.8	2.2	110.28	40.4	69.88	0	4	15	34	7	16	11	54	26	19	9	8.8	2
NO.255	87	2	3	2	1	2.37	2.5	2.4	2.2	2.4	140.74	56.44	84.3	0	3	18	32	6	14	12	51	25	18	8	8.5	1
NO.256	89	2	3	2	1	2.16	2	2.2	2.2	2.2	115.85	32.65	83.2	0	4	16	33	6	15	12	55	28	20	7	8.7	2
NO.257	75	1	3	2	1	2.47	2.5	2.4	2.4	2.6	191.77	94.03	76.77	20.97	2	21	33	5	15	13	46	26	15	5	7.4	1
NO.258	90	1	3	2	1	1.89	1.5	2	1.8	2.2	114.74	38.8	75.94	0	4	15	35	11	12	12	51	24	18	9	8.9	2
NO.259	66	2	3	2	1	3.21	3.5	3	3.2	3.2	220.5	136.7	50.2	33.6	1	23	35	9	15	11	23	14	4	5	6.7	3
NO.260	66	2	3	2	1	3.37	3.5	3.2	3.4	3.4	225.96	137.3	50.78	37.88	1	25	34	9	15	10	25	14	6	5	6.6	3
NO.261	79	1	3	2	1	2.47	2.5	2.6	2.4	2.4	184.8	63.55	90.75	30.5	4	18	32	5	15	12	47	20	17	10	7.8	1
NO.262	85	2	3	2	1	2.05	2	2	2	2.2	117.86	75.77	42.09	0	4	14	34	9	15	10	53	26	18	9	8.5	2
NO.263	65	2	2	1	1	3.37	3.5	3.4	3.2	3.4	213.21	94.41	95.3	23.5	1	24	39	12	16	11	22	7	6	9	6.6	3
NO.264	86	2	3	2	1	2.21	2	2	2.4	2.4	136.84	50.4	86.44	0	3	14	35	9	14	12	50	29	15	6	8.7	2
NO.265	70	1	3	2	1	2.84	3	2.8	2.8	2.8	221	114.3	75.8	30.9	2	24	36	10	15	11	35	15	10	10	7.4	1
NO.266	89	1	3	2	3	2	2	2	2	2	119.74	40.3	79.44	0	5	15	38	9	20	9	55	28	20	7	8.6	2
NO.267	67	1	3	1	1	3.05	3.5	3.2	2.8	2.8	219.64	89.9	105.44	24.3	3	23	34	5	18	11	31	15	8	8	6.5	3
NO.268	98	1	3	2	3	2.16	2.5	2	2	2.2	112.1	33.9	78.2	0	4	16	35	7	17	11	56	28	18	10	8.6	2
NO.269	78	1	2	2	1	2.42	2.5	2.4	2.4	2.6	174.88	74.4	79.88	20.6	2	22	32	7	14	11	45	21	17	7	7.6	1
NO.270	77	2	3	2	4	2.63	3	2.6	2.6	2.6	208.9	79.4	108.5	21	2	23	34	9	16	9	45	23	17	5	7.4	1
NO.271	75	2	3	1	1	2.58	3	2.4	2.6	2.6	220.6	87.8	111.8	21	3	23	29	5	12	12	47	19	18	10	7.5	1
NO.272	75	2	3	2	4	2.68	3	2.6	2.8	2.6	178.92	50.12	104.3	24.5	2	24	32	7	14	11	44	21	16	7	7.2	1
NO.273	77	1	3	2	1	2.37	2.5	2.4	2.4	2.2	197.6	74.35	99.25	24	3	20	32	7	12	13	46	25	11	10	7.7	1
NO.274	89	1	2	1	1	2.32	2.5	2.4	2.2	2.2	138.17	59.4	78.77	0	4	15	32	10	10	12	49	25	17	7	8.2	2
NO.275	76	2	3	2	1	2.53	2.5	2.4	2.4	2.8	189.63	74.3	115.33	0	1	24	33	9	14	10	42	19	17	6	7.5	1
NO.276	81	2	3	1	1	2.53	3	2.4	2.4	2.4	181.9	78.5	103.4	0	3	18	30	8	12	10	45	21	17	7	7.9	1
NO.277	78	1	3	2	1	2.47	2.5	2.4	2.4	2.6	207.78	87.4	99.88	20.5	2	22	33	8	14	11	41	23	10	8	7.7	1
NO.278	79	1	3	2	1	2.47	2.5	2.6	2.4	2.4	144.3	53.55	90.75	0	3	18	32	7	15	10	46	24	15	7	7.7	1
NO.279	72	1	3	2	1	2.58	3	2.4	2.6	2.4	210.5	94.3	95.8	20.4	2	23	35	10	15	10	42	19	14	9	7.3	1
NO.280	64	1	1	2	2	3.32	3.5	3.4	3.2	3.2	254.3	125.6	92.3	36.4	0	25	36	10	16	10	22	10	6	6	6.5	3
NO.281	62	1	2	2	1	3.26	3.5	3.2	3.2	3.2	241.56	130.6	78.3	32.66	0	25	30	9	11	10	18	6	4	8	6.5	3
NO.282	82	1	3	2	1	2.21	2	2.4	2.2	2.2	167.89	61.78	106.11	0	4	16	31	7	12	12	48	30	10	8	8	2
NO.283	64	2	3	2	1	3.26	3.5	3.2	3.2	3.2	252.56	130.6	89.3	32.66	1	24	32	6	14	12	24	10	5	9	6.6	3
NO.284	69	2	2	1	1	2.84	3	2.8	3	2.6	221.86	94.3	106.66	20.9	2	24	36	9	16	11	40	20	10	10	6.7	1
NO.285	87	1	3	2	1	2.32	2.5	2.4	2.2	2.2	131.1	50.6	80.5	0	3	17	35	8	15	12	52	24	20	8	8.3	2
NO.286	75	1	3	2	1	2.58	2.5	2.6	2.6	2.6	214.6	110.7	79.6	24.3	3	23	32	7	16	9	40	16	14	10	7.4	1
NO.287	63	1	3	1	1	3.26	3.5	3.2	3.2	3.2	228.17	107.33	89.2	31.64	2	23	27	6	10	11	24	10	7	7	6.6	3
NO.288	76	2	3	2	1	2.68	3	2.6	2.6	2.6	197.9	89.4	108.5	0	2	23	32	6	15	11	38	20	10	8	7.4	1
NO.289	86	2	3	1	1	2.21	2	2.4	2.2	2.2	154.2	68.64	85.56	0	4	14	32	11	11	10	51	22	19	10	8.7	2
NO.290	74	1	3	2	1	2.63	3	2.4	2.6	2.6	145.9	57.8	61.8	26.3	2	22	36	10	15	11	30	14	10	6	7.6	1
NO.291	69	2	3	2	1	2.95	3	2.8	3	3	200.1	107.3	65.14	27.66	1	25	36	10	15	11	34	15	10	9	6.7	3
NO.292	74	2	3	2	4	2.68	2.5	2.8	2.8	2.6	194.45	86.55	81.4	26.5	2	24	36	11	12	13	38	22	11	5	7.3	1
NO.293	85	1	3	2	1	2.21	2.5	2	2.2	2.2	134.16	63.97	70.19	0	3	15	43	12	18	13	55	29	20	6	8.1	2
NO.294	70	1	3	2	1	2.95	3	3	2.8	3	213.58	104.8	87.23	21.55	2	23	37	10	17	10	34	16	10	8	7.1	3
NO.295	62	2	1	2	2	3.42	3.5	3.4	3.4	3.4	247.95	124.6	86.67	36.68	1	25	36	8	16	12	18	6	4	8	6.5	3
NO.296	88	2	3	1	1	2.32	2.5	2.2	2.2	2.4	140.74	56.44	84.3	0	3	17	28	8	10	10	55	29	20	6	8.5	2
NO.297	80	1	3	2	1	2.32	2.5	2.6	2.2	2	165.1	68.9	96.2	0	3	19	31	7	12	12	52	26	18	8	7.9	2
NO.298	77	1	2	1	1	2.47	2.5	2.4	2.4	2.6	176.2	63.9	112.3	0	4	21	31	7	10	14	43	23	15	5	7.6	1
NO.299	77	2	3	1	1	2.47	2.5	2.4	2.4	2.6	176.2	63.9	112.3	0	4	21	32	10	13	9	44	16	18	10	7.4	1
NO.300	82	2	3	1	1	2.16	2	2.2	2.2	2.2	147.8	45.7	102.1	0	3	17	33	10	13	10	50	21	20	9	8	2
NO.301	86	2	3	2	1	2.26	2	2.4	2.2	2.4	166.79	58.37	108.42	0	3	16	32	9	13	10	52	26	18	8	8.6	2
NO.302	76	1	3	2	1	2.74	3	2.8	2.6	2.6	207.82	109.5	73.32	25	2	24	33	8	15	10	38	16	13	9	7.5	1
NO.303	75	1	3	1	1	2.47	2.5	2.4	2.4	2.6	201.77	94.03	86.77	20.97	4	20	36	10	17	9	41	26	10	5	7.6	1
NO.304	74	1	2	2	3	2.79	3	2.8	2.6	2.8	202.75	99.43	77.56	25.76	1	24	38	10	15	13	38	16	14	8	7	1
NO.305	81	1	3	1	1	2.53	3	2.4	2.4	2.4	180.69	90.69	68.98	21.02	3	20	34	8	14	12	43	23	12	8	8.1	1
NO.306	72	2	3	2	1	2.79	3	2.8	2.6	2.8	229.27	99.5	109.77	20	1	24	36	10	16	10	39	21	11	7	7	1
NO.307	72	2	3	2	1	2.74	3	2.8	2.4	2.8	194.26	85.3	88.56	20.4	2	23	36	6	17	13	40	15	15	10	7	1
NO.308	74	1	3	2	1	2.63	3	2.4	2.6	2.6	205.9	97.8	81.8	26.3	2	23	32	7	14	11	40	18	13	9	7.3	1
NO.309	75	1	3	2	1	2.74	3	2.6	2.6	2.8	220.6	129.4	62.6	28.6	2	23	32	6	15	11	39	15	14	10	7.5	1
NO.310	74	1	3	2	1	2.68	3	2.6	2.4	2.8	200.75	89.43	75.56	35.76	2	24	29	6	10	13	41	15	16	10	7.4	1
NO.311	70	1	3	2	1	2.84	3	2.8	2.8	2.8	212.98	104.38	79.4	29.2	2	24	27	5	10	12	33	10	13	10	6.9	1
NO.312	70	1	3	2	1	3	3.5	3	2.8	2.8	218.52	125.6	60.7	32.22	2	23	31	6	14	11	35	14	12	9	7.2	3
NO.313	61	1	3	2	1	3.42	3.5	3.4	3.4	3.4	250.25	135.3	80.4	34.55	0	25	33	8	15	10	20	10	5	5	6.5	3
NO.314	67	1	1	2	1	3.16	3.5	3.2	3	3	220.3	119.5	71.25	29.55	1	24	32	6	15	11	32	14	8	10	6.5	3
NO.315	72	1	2	2	1	2.74	3	2.8	2.4	2.8	194.26	85.3	88.56	20.4	2	24	29	5	12	12	40	17	15	8	7.1	1
NO.316	73	1	1	2	1	2.89	3	3	2.8	2.8	230.03	123.2	82.51	24.32	1	25	35	9	15	11	26	8	9	9	7	3
NO.317	65	1	1	2	1	3.26	3.5	3.2	3.2	3.2	252.56	130.6	89.3	32.66	0	26	34	9	15	10	21	9	4	8	6.6	3
NO.318	75	1	3	2	1	2.63	3	2.6	2.6	2.6	218.4	99.4	98.5	20.5	2	21	31	6	15	10	40	16	14	10	7.5	1
NO.319	62	1	1	2	1	3.26	3.5	3.2	3.2	3.2	236.48	130.58	70.3	35.6	0	23	34	8	15	11	22	14	4	4	6.5	3
NO.320	68	1	2	2	1	2.95	3.5	3	2.8	2.6	211.96	131.22	51.34	29.4	2	22	29	7	10	12	28	10	10	8	6.7	3
NO.321	63	1	3	2	2	3.26	3.5	3.4	3.2	3	254.6	155.4	59.68	39.52	1	24	31	6	16	9	23	12	5	6	6.5	3
NO.322	69	1	3	1	1	2.95	3.5	2.8	2.8	2.8	212.7	97.3	90.8	24.6	2	22	28	6	13	9	32	14	9	9	7	3
NO.323	74	2	3	1	1	2.68	3	2.8	2.6	2.6	175.9	67.8	81.8	26.3	3	23	29	8	11	10	45	21	17	7	7.3	1
NO.324	96	2	3	2	1	1.89	1.5	2	1.8	2.2	104.74	38.8	65.94	0	4	15	28	7	10	11	54	28	18	8	8.6	2
NO.325	73	1	2	2	2	2.84	3	2.8	2.8	2.8	214.26	105.3	88.56	20.4	1	24	32	6	14	12	29	17	5	7	7.1	1
NO.326	78	1	3	2	1	2.47	2.5	2.4	2.4	2.6	205.53	92.12	92.71	20.7	3	23	29	5	12	12	45	15	20	10	7.7	1
NO.327	71	2	3	2	1	2.79	3	2.8	2.6	2.8	211.68	94.78	96.5	20.4	2	23	33	8	17	8	38	14	15	9	7	1
NO.328	68	2	3	2	1	2.95	3.5	3	2.8	2.6	211.96	131.22	51.34	29.4	1	23	36	9	16	11	26	11	7	8	6.8	3
NO.329	79	2	2	2	1	2.47	2.5	2.4	2.4	2.6	155.6	56.7	98.9	0	2	19	29	6	11	12	42	22	14	6	7.5	1
NO.330	65	1	3	2	1	3.32	3.5	3.4	3.2	3.2	254.3	125.6	92.3	36.4	0	25	37	10	15	12	23	7	10	6	6.5	3
NO.331	76	1	3	2	1	2.63	3	2.6	2.6	2.6	192.78	94.4	67.5	30.88	2	23	37	10	15	12	39	16	17	6	7.6	1
NO.332	70	2	3	2	1	2.95	3	2.8	3	3	220.1	97.3	85.14	37.66	1	25	37	10	15	12	36	13	16	7	6.7	3
NO.333	81	2	3	2	1	2.11	2	2.6	2	1.8	211.1	108.5	76.3	26.3	3	19	39	10	17	12	49	29	15	5	8.3	2
NO.334	71	2	2	2	4	2.89	3	2.8	2.8	3	226.26	99.3	96.41	30.55	1	24	29	6	11	12	33	11	12	10	6.8	3
NO.335	86	2	3	2	1	2.42	2.5	2.4	2.4	2.4	245.9	126.3	89.8	29.8	3	16	32	9	13	10	51	26	17	8	8.3	1
NO.336	72	2	3	2	1	2.63	3	2.6	2.4	2.6	206.94	110.3	66.2	30.44	3	22	34	9	13	12	38	20	10	8	7.1	1
NO.337	73	1	3	1	2	2.58	3	2.2	2.6	2.6	214.14	112.7	62.89	38.55	3	23	32	10	12	10	42	21	14	7	7.4	1
NO.338	64	2	2	2	1	3.26	3.5	3.2	3	3.4	241.95	96.45	119.7	25.8	1	24	37	11	16	10	25	14	6	5	6.5	3
NO.339	65	2	3	2	1	3.37	3.5	3.4	3.2	3.4	229	120.1	72.5	36.4	0	26	35	10	12	13	24	9	10	5	6.5	3
NO.340	79	2	3	2	4	2.42	3	2.8	2	2	157	68.6	88.4	0	3	18	34	10	12	12	45	23	17	5	7.6	1
NO.341	83	1	3	2	1	2.21	2.5	2	2.2	2.2	144.16	50.19	93.97	0	4	15	37	13	12	12	55	30	20	5	8.1	2
NO.342	76	2	3	2	1	2.63	3	2.6	2.6	2.6	208.4	89.4	98.5	20.5	2	24	33	7	16	10	38	17	13	8	7.4	1
NO.343	68	2	3	2	1	3	3	2.8	3	3.2	229.18	128.29	66.3	34.59	1	22	34	8	14	12	25	10	5	10	6.7	3
NO.344	75	1	3	2	1	2.74	3	2.6	2.6	2.8	202	99.4	102.6	0	2	22	35	9	14	12	39	18	14	7	7.2	1
NO.345	84	1	3	2	1	2.11	2	2.6	2	1.8	134.8	58.5	76.3	0	3	17	34	10	12	12	51	25	17	9	7.9	2
NO.346	67	2	3	2	1	3.05	3	3	3.2	3	233.32	109.4	103.22	20.7	1	25	35	9	16	10	30	12	11	7	6.5	3
NO.347	77	2	3	2	1	2.53	2.5	2.4	2.6	2.6	166.17	56.77	109.4	0	3	22	34	9	13	12	45	21	18	6	7.4	1
NO.348	70	2	1	2	1	3.21	3.5	3.2	3	3.2	214.48	125.7	67.88	20.9	0	26	32	8	14	10	32	11	11	10	6.8	3
NO.349	74	1	3	2	1	2.63	3	2.4	3	2.2	206.11	106.4	70.58	29.13	3	24	33	10	13	10	45	21	18	6	7.1	1
NO.350	78	2	3	1	1	2.47	2.5	2.4	2.4	2.6	173.52	60.92	112.6	0	4	22	36	12	12	12	46	27	11	8	7.8	1
